# Supplementary material
Source: MDPI journal article supplement (https://www.mdpi.com/2073-4441/11/7/1468)
Supplement: s1 [file s1]

# Supplementary Materials

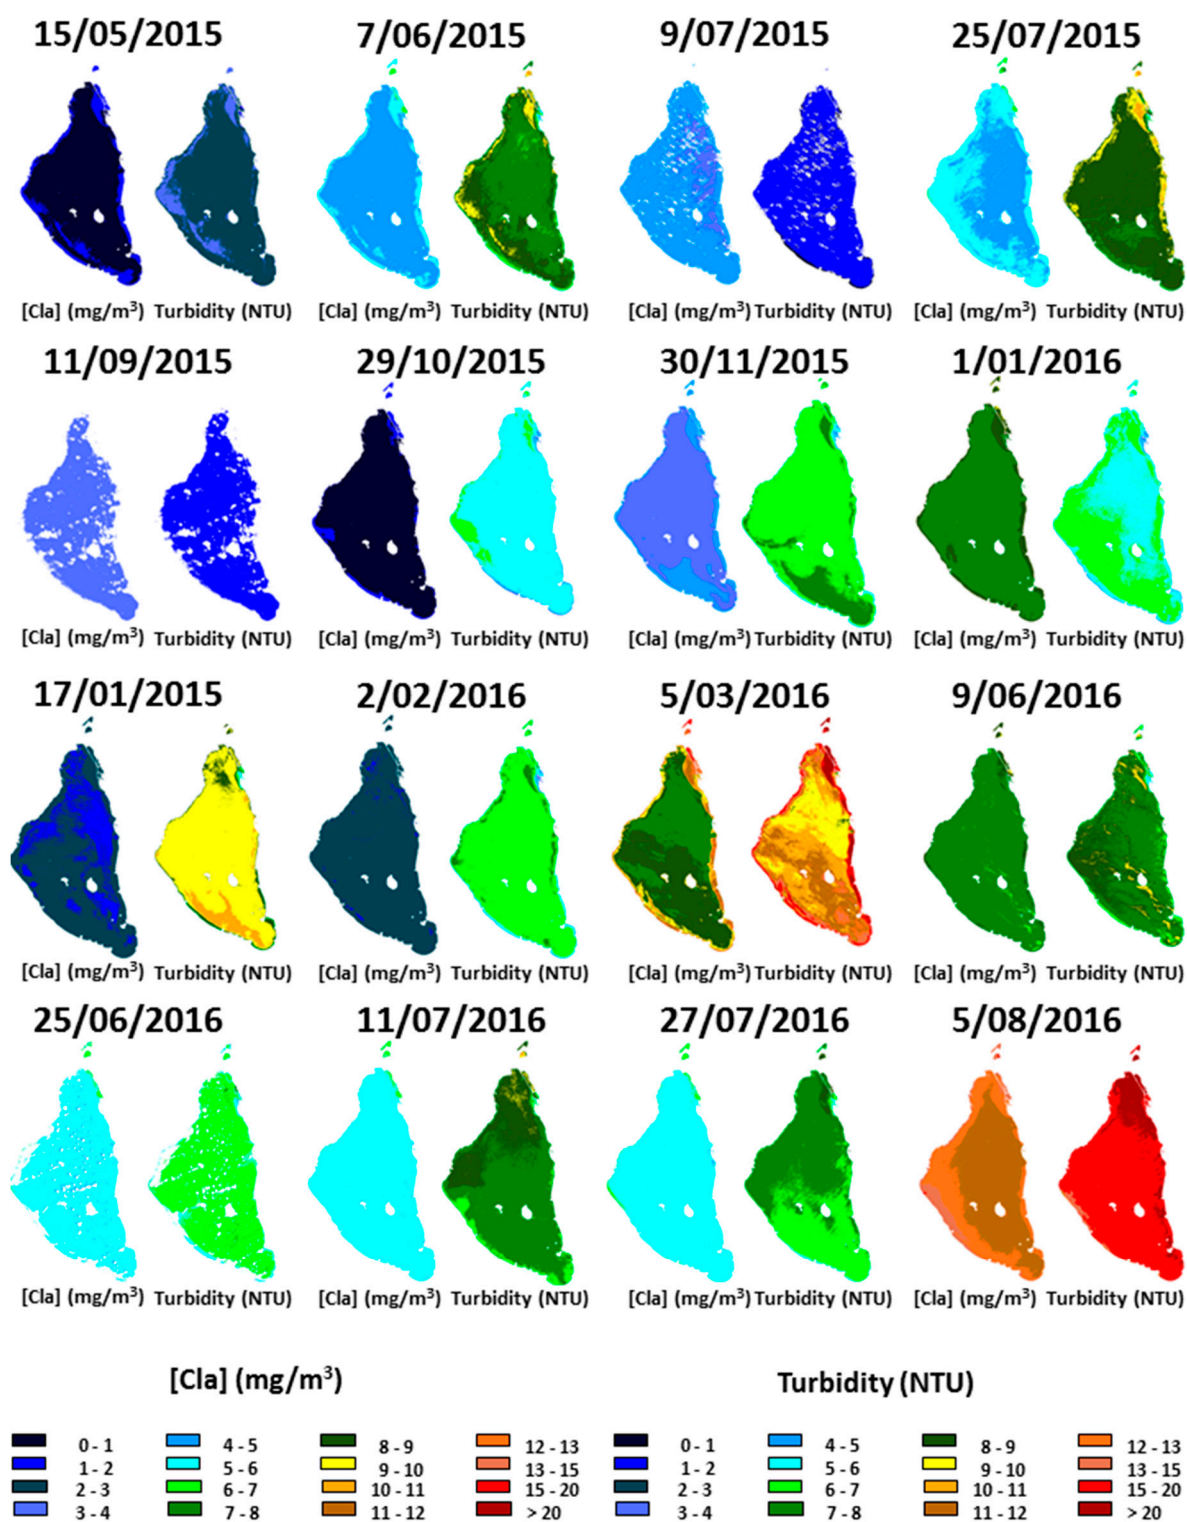

Figure S1. Turbidity and chlorophyll-a concentration thematic maps.

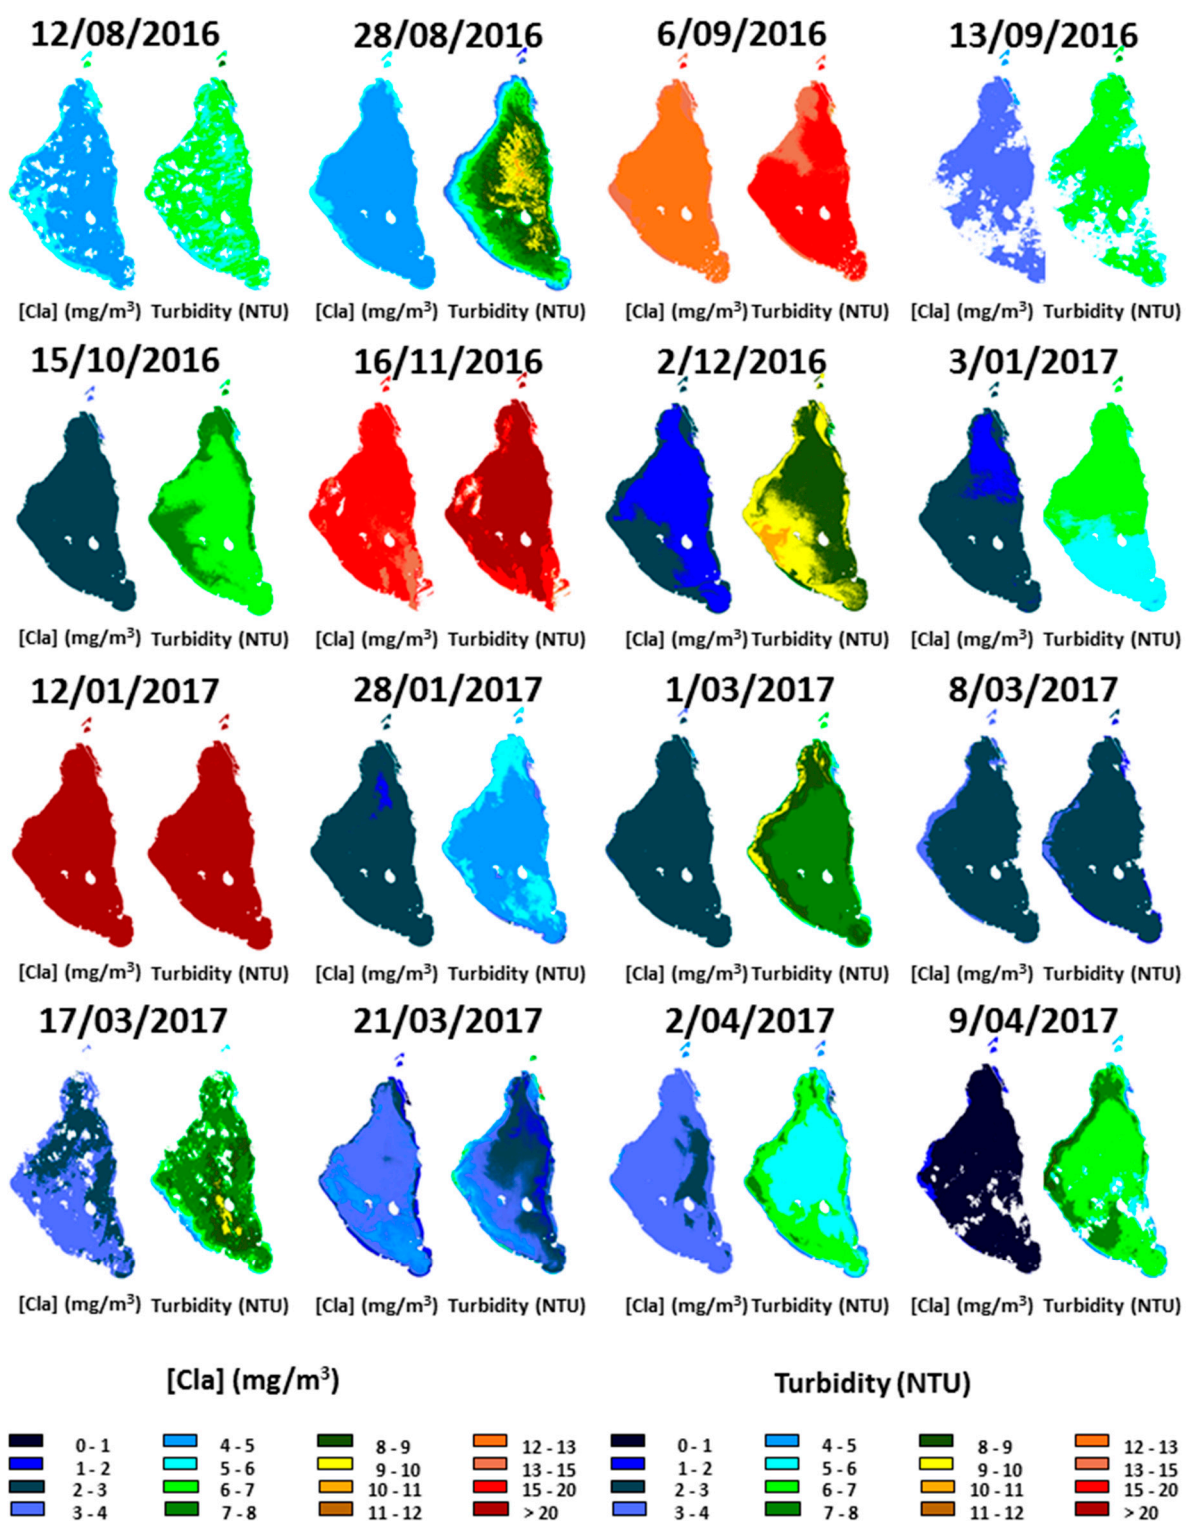

Figure S2. Turbidity and chlorophyll-a concentration thematic maps.

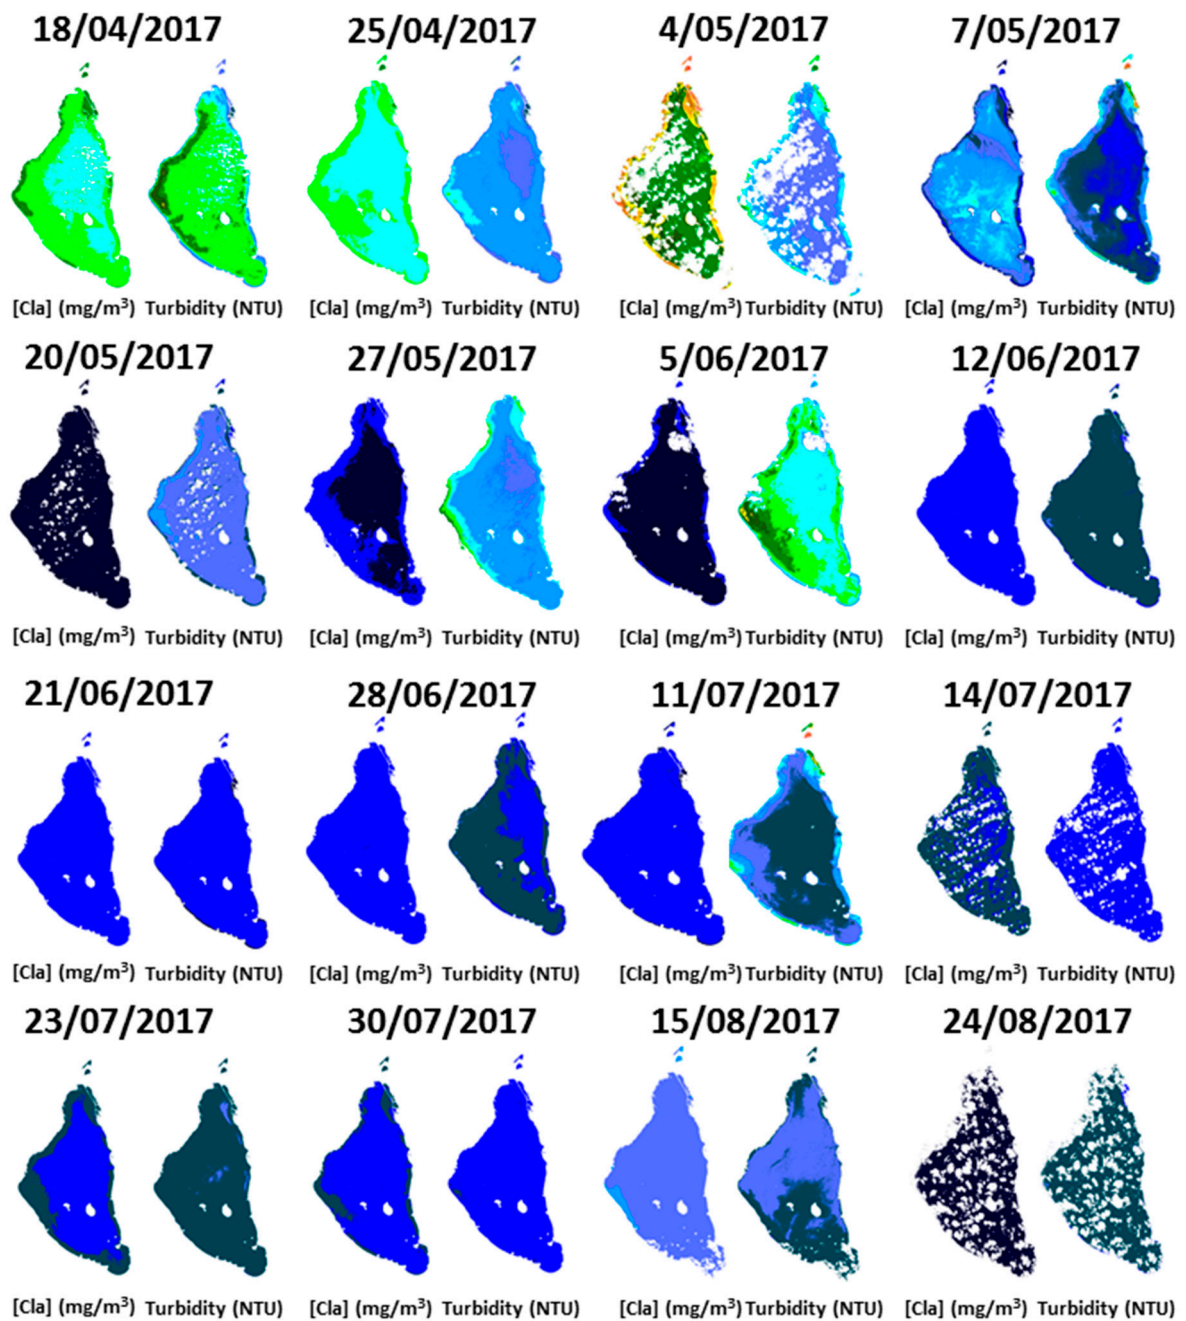

Figure S3. Turbidity and chlorophyll-a concentration thematic maps.



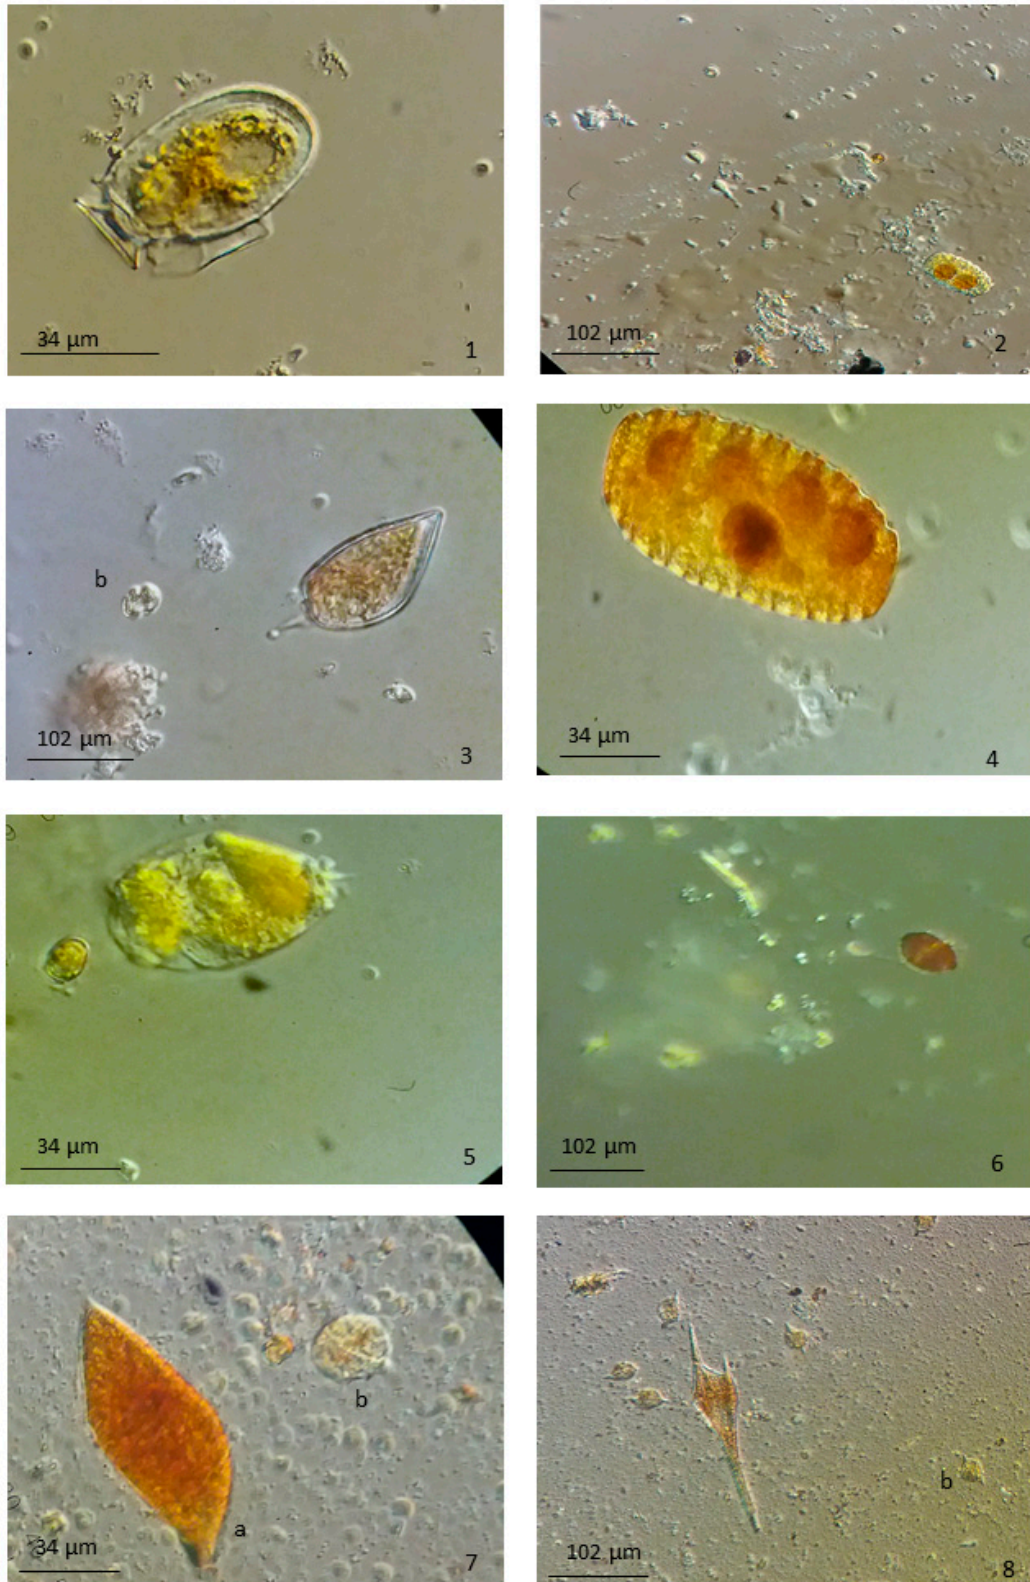

**Figure S4.** Images of some genera of phytoplankton found in deep samples of the Mar Menor in an approximately central point (by Nuria Hernández-Sáez). The graphical scale is shown in each image. The dates of the samples are 2017-05-08 (1, 2, & 3), 2017-06-25 (4, 5, & 6) and 2017-09-01 (7 & 8). 1- *Dinophysis*; 2. *Euastrum*; 3. *Prorocentrum*. 4. *Polykrikos*; 5 & 6. *Gymnodinium*; 7a. *Gyrodinium*; 8. *Ceratium*; 3b, 7b, & 8b. *Peridinium*. In 7 & 8 there are also nanoplankton, smaller than 3-5  $\mu\text{m}$ , covering the slide.
